# Supplementary material for: Monodispersity and stability: case of ultrafine aluminium nanoparticles (<5 nm) synthesized by the solvated metal atom dispersion approach
Source: Royal Society of Chemistry journal article supplement (doi:10.1039/c2jm16764f), 2012-01-01
Supplement: c2jm16764f.pdf [file c2jm16764f.pdf]

# ESI

## **Monodispersity and stability: case of ultrafine aluminum nanoparticles (<5 nm) synthesized by the solvated metal atom dispersion approach**

*Neha Arora and Balaji R. Jagirdar\**

Department of Inorganic & Physical Chemistry, Indian Institute of Science, Bangalore

560012, India

[jagirdar@ipc.iisc.ernet.in](mailto:jagirdar@ipc.iisc.ernet.in)

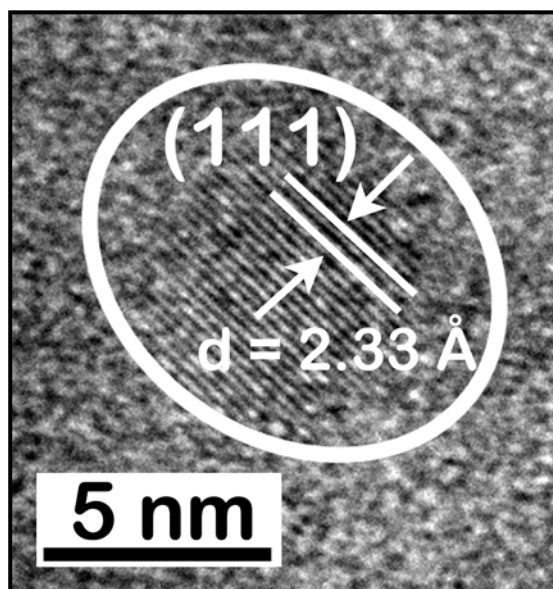

**Fig S1.** HRTEM image of Al-THF nanoparticles

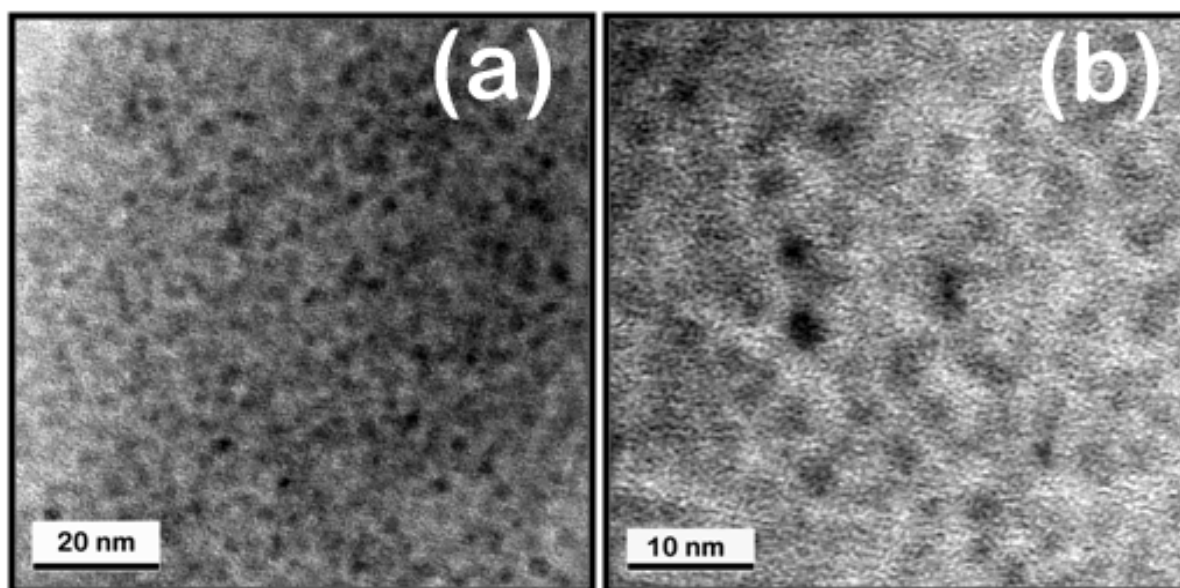

**Fig. S2** BFTEM images of HDA capped Al nanoparticles

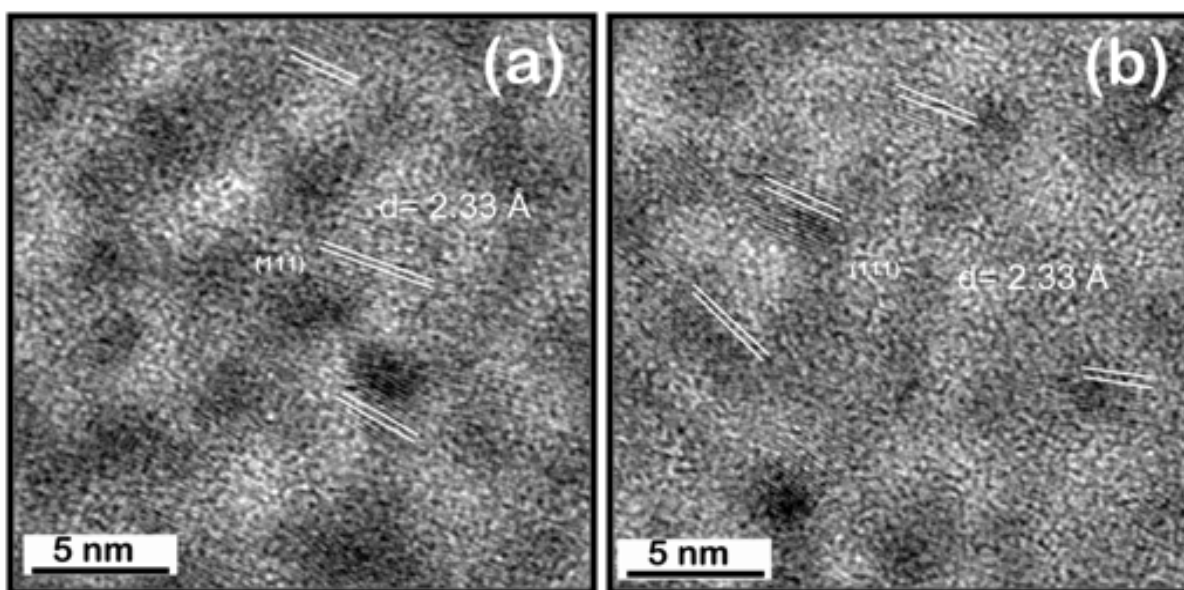

**Fig. S3** HRTEM images of HDA capped Al nanoparticles

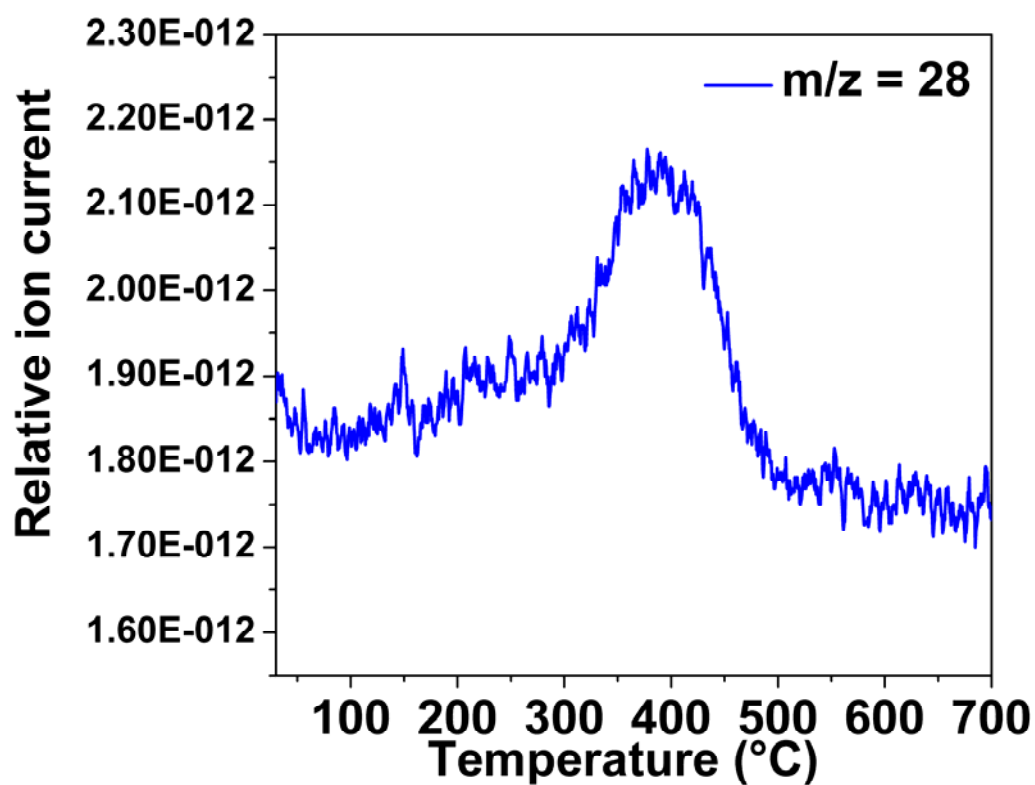

**Fig. S4** MS Profile of  $m/z = 28$  ( $\text{N}_2$ ) for HDA capped Al nanoparticles, the ramp rate is  $5 \text{ K min}^{-1}$ .

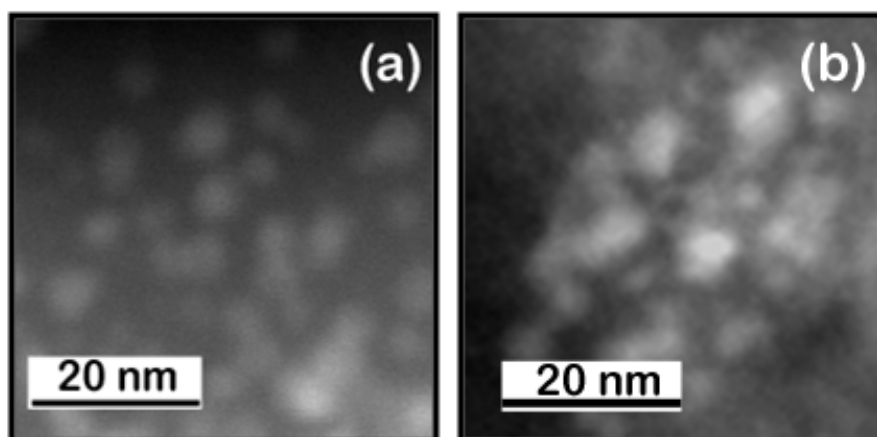

**Fig. S5** (a), (b) HAADF images of Al-HDA nanoparticles annealed at  $300 \text{ }^{\circ}\text{C}$ .
